# Supplementary material
Source: publisher site journal article supplement (https://www.spandidos-publications.com/5838/downloadSupplementary)
Supplement: Supplementary file 1 [file downloadSupplementary]

Table SI. Top 200 genes positively correlated with LAMC2.

| Gene       | Cytoband      | Spearman's correlation | P-value               | q-value               |
|------------|---------------|------------------------|-----------------------|-----------------------|
| FRMD6      | 14q22.1       | 0.766                  | 5.19x10 <sup>-8</sup> | 6.16x10 <sup>-4</sup> |
| TNFSF18    | 1q25.1        | 0.756                  | 9.61x10 <sup>-8</sup> | 6.16x10 <sup>-4</sup> |
| RUNX1      | 21q22.12      | 0.749                  | 1.48x10 <sup>-7</sup> | 6.16x10 <sup>-4</sup> |
| TMEM200A   | 6q23.1        | 0.745                  | 1.86x10 <sup>-7</sup> | 6.16x10 <sup>-4</sup> |
| SMURF2     | 17q23.3-q24.1 | 0.743                  | 2.12x10 <sup>-7</sup> | 6.16x10 <sup>-4</sup> |
| BICD1      | 12p11.21      | 0.743                  | 2.16x10 <sup>-7</sup> | 6.16x10 <sup>-4</sup> |
| TACSTD2    | 1p32.1        | 0.74                   | 2.50x10 <sup>-7</sup> | 6.16x10 <sup>-4</sup> |
| INHBA      | 7p14.1        | 0.74                   | 2.53x10 <sup>-7</sup> | 6.16x10 <sup>-4</sup> |
| ARNTL2     | 12p11.23      | 0.727                  | 5.09x10 <sup>-7</sup> | 1.10x10 <sup>-3</sup> |
| CCN2       | 6q23.2        | 0.724                  | 5.92x10 <sup>-7</sup> | 1.15x10 <sup>-3</sup> |
| RAB42      | 1p35.3        | 0.72                   | 7.25x10 <sup>-7</sup> | 1.26x10 <sup>-3</sup> |
| MYADM      | 19q13.42      | 0.719                  | 7.75x10 <sup>-7</sup> | 1.26x10 <sup>-3</sup> |
| RNF24      | 20p13         | 0.715                  | 9.58x10 <sup>-7</sup> | 1.43x10 <sup>-3</sup> |
| CTHRC1     | 8q22.3        | 0.711                  | 1.20x10 <sup>-6</sup> | 1.59x10 <sup>-3</sup> |
| DACT1      | 14q23.1       | 0.71                   | 1.23x10 <sup>-6</sup> | 1.59x10 <sup>-3</sup> |
| SVIL       | 10p11.23      | 0.708                  | 1.34x10 <sup>-6</sup> | 1.63x10 <sup>-3</sup> |
| TGFB2      | 1q41          | 0.703                  | 1.73x10 <sup>-6</sup> | 1.87x10 <sup>-3</sup> |
| ANTXR1     | 2p13.3        | 0.699                  | 2.08x10 <sup>-6</sup> | 2.05x10 <sup>-3</sup> |
| CSGALNACT2 | 10q11.21      | 0.695                  | 2.53x10 <sup>-6</sup> | 2.24x10 <sup>-3</sup> |
| THBS1      | 15q14         | 0.693                  | 2.75x10 <sup>-6</sup> | 2.33x10 <sup>-3</sup> |
| MBOAT2     | 2p25.1        | 0.692                  | 2.92x10 <sup>-6</sup> | 2.37x10 <sup>-3</sup> |
| SERTAD4    | 1q32.2        | 0.69                   | 3.19x10 <sup>-6</sup> | 2.48x10 <sup>-3</sup> |
| THBS2      | 6q27          | 0.688                  | 3.58x10 <sup>-6</sup> | 2.51x10 <sup>-3</sup> |
| ISM1       | 20p12.1       | 0.688                  | 3.62x10 <sup>-6</sup> | 2.51x10 <sup>-3</sup> |
| COL10A1    | 6q22.1        | 0.683                  | 4.51x10 <sup>-6</sup> | 3.03x10 <sup>-3</sup> |
| PCDH10     | 4q28.3        | 0.681                  | 4.88x10 <sup>-6</sup> | 3.08x10 <sup>-3</sup> |
| KRT16      | 17q21.2       | 0.681                  | 4.91x10 <sup>-6</sup> | 3.08x10 <sup>-3</sup> |
| COL8A1     | 3q12.1        | 0.675                  | 6.42x10 <sup>-6</sup> | 3.90x10 <sup>-3</sup> |
| MRC2       | 17q23.2       | 0.673                  | 7.01x10 <sup>-6</sup> | 4.13x10 <sup>-3</sup> |
| NTM        | 11q25         | 0.67                   | 7.92x10 <sup>-6</sup> | 4.37x10 <sup>-3</sup> |
| B4GALNT3   | 12p13.33      | 0.67                   | 7.92x10 <sup>-6</sup> | 4.37x10 <sup>-3</sup> |
| ANGPTL2    | 9q33.3        | 0.669                  | 8.09x10 <sup>-6</sup> | 4.37x10 <sup>-3</sup> |
| LRP1       | 12q13.3       | 0.667                  | 8.74x10 <sup>-6</sup> | 4.57x10 <sup>-3</sup> |
| EDIL3      | 5q14.3        | 0.664                  | 1.02x10 <sup>-5</sup> | 4.96x10 <sup>-3</sup> |
| RGPD6      | 2q13          | 0.662                  | 1.11x10 <sup>-5</sup> | 5.25x10 <sup>-3</sup> |
| RGPD3      | 2q12.2        | 0.661                  | 1.14x10 <sup>-5</sup> | 5.29x10 <sup>-3</sup> |
| NALCN      | 13q32.3-q33.1 | 0.66                   | 1.21x10 <sup>-5</sup> | 5.44x10 <sup>-3</sup> |
| CCN1       | 1p22.3        | 0.659                  | 1.23x10 <sup>-5</sup> | 5.44x10 <sup>-3</sup> |
| SGIP1      | 1p31.3        | 0.658                  | 1.30x10 <sup>-5</sup> | 5.60x10 <sup>-3</sup> |
| ITGA2      | 5q11.2        | 0.657                  | 1.35x10 <sup>-5</sup> | 5.60x10 <sup>-3</sup> |

|           |                 |       |                        |                       |
|-----------|-----------------|-------|------------------------|-----------------------|
| PGR       | 11q22.1         | 0.657 | 1.37x10 <sup>-5</sup>  | 5.60x10 <sup>-3</sup> |
| GPRC5A    | 12p13.1         | 0.656 | 1.38x10 <sup>-5</sup>  | 5.60x10 <sup>-3</sup> |
| CPED1     | 7q31.31         | 0.653 | 1.58x10 <sup>-5</sup>  | 6.21x10 <sup>-3</sup> |
| CDH11     | 16q21           | 0.653 | 1.60x10 <sup>-5</sup>  | 6.21x10 <sup>-3</sup> |
| SIX4      | 14q23.1         | 0.652 | 1.63x10 <sup>-5</sup>  | 6.22x10 <sup>-3</sup> |
| NAV3      | 12q21.2         | 0.65  | 1.77x10 <sup>-5</sup>  | 6.44x10 <sup>-3</sup> |
| VCAN      | 5q14.2-q14.3    | 0.65  | 1.79x10 <sup>-5</sup>  | 6.44x10 <sup>-3</sup> |
| DOCK7     | 1p31.3          | 0.647 | 2.00x10 <sup>-5</sup>  | 6.46x10 <sup>-3</sup> |
| ADGB      | 6q24.3          | 0.647 | 2.02x10 <sup>-5</sup>  | 6.46x10 <sup>-3</sup> |
| SULF1     | 8q13.2-q13.3    | 0.647 | 2.04x10 <sup>-5</sup>  | 6.46x10 <sup>-3</sup> |
| IRAK2     | 3p25.3          | 0.646 | 2.12x10 <sup>-5</sup>  | 6.56x10 <sup>-3</sup> |
| RGPD4     | 2q12.3          | 0.643 | 2.32x10 <sup>-5</sup>  | 6.92x10 <sup>-3</sup> |
| RGPD5     | 2q13            | 0.642 | 2.39x10 <sup>-5</sup>  | 6.95x10 <sup>-3</sup> |
| ASAP2     | 2p25.1 2p24     | 0.641 | 2.52x10 <sup>-5</sup>  | 7.19x10 <sup>-3</sup> |
| KIF5A     | 12q13.3         | 0.636 | 3.08x10 <sup>-5</sup>  | 8.43x10 <sup>-3</sup> |
| CXORF49B  | Xq13.1          | 0.633 | 3.40x10 <sup>-5</sup>  | 9.06x10 <sup>-3</sup> |
| KLF17     | 1p34.1          | 0.632 | 3.56x10 <sup>-5</sup>  | 9.14x10 <sup>-3</sup> |
| WDR47     | 1p13.3          | 0.631 | 3.74x10 <sup>-5</sup>  | 9.14x10 <sup>-3</sup> |
| FUT11     | 10q22.2         | 0.63  | 3.78x10 <sup>-5</sup>  | 9.14x10 <sup>-3</sup> |
| SYT16     | 14q23.2         | 0.63  | 3.81x10 <sup>-5</sup>  | 9.14x10 <sup>-3</sup> |
| CNN3      | 1p21.3          | 0.63  | 3.82x10 <sup>-5</sup>  | 9.14x10 <sup>-3</sup> |
| F2R       | 5q13.3          | 0.63  | 3.82x10 <sup>-5</sup>  | 9.14x10 <sup>-3</sup> |
| ARHGAP21  | 10p12.1 10p12.3 | 0.629 | 3.96x10 <sup>-5</sup>  | 9.14x10 <sup>-3</sup> |
| ACTBL2    | 5q11.2          | 0.629 | 4.00 x10 <sup>-5</sup> | 9.14x10 <sup>-3</sup> |
| CHSY1     | 15q26.3         | 0.627 | 4.24x10 <sup>-5</sup>  | 9.14x10 <sup>-3</sup> |
| SCAMP1    | 5q14.1          | 0.627 | 4.28x10 <sup>-5</sup>  | 9.14x10 <sup>-3</sup> |
| TGFBI     | 5q31.1          | 0.627 | 4.32x10 <sup>-5</sup>  | 9.14x10 <sup>-3</sup> |
| RBMXL1    | 1p22.2          | 0.626 | 4.40x10 <sup>-5</sup>  | 9.14x10 <sup>-3</sup> |
| AFAP1     | 4p16.1          | 0.626 | 4.40x10 <sup>-5</sup>  | 9.14x10 <sup>-3</sup> |
| FAP       | 2q24.2          | 0.626 | 4.44x10 <sup>-5</sup>  | 9.14x10 <sup>-3</sup> |
| COL11A1   | 1p21.1          | 0.626 | 4.47x10 <sup>-5</sup>  | 9.14x10 <sup>-3</sup> |
| PTPN12    | 7q11.23         | 0.625 | 4.57x10 <sup>-5</sup>  | 9.14x10 <sup>-3</sup> |
| TMC7      | 16p12.3         | 0.625 | 4.57x10 <sup>-5</sup>  | 9.14x10 <sup>-3</sup> |
| GLT8D2    | 12q23.3         | 0.625 | 4.57x10 <sup>-5</sup>  | 9.14x10 <sup>-3</sup> |
| IGFL2     | 19q13.32        | 0.625 | 4.58x10 <sup>-5</sup>  | 9.14x10 <sup>-3</sup> |
| DPYSL3    | 5q32            | 0.625 | 4.61x10 <sup>-5</sup>  | 9.14x10 <sup>-3</sup> |
| BTBD19    | 1p34.1          | 0.623 | 5.01x10 <sup>-5</sup>  | 9.74x10 <sup>-3</sup> |
| STAM      | 10p12.33        | 0.622 | 5.10x10 <sup>-5</sup>  | 9.83x10 <sup>-3</sup> |
| CTSE      | 1q32.1          | 0.622 | 5.22x10 <sup>-5</sup>  | 9.95x10 <sup>-3</sup> |
| COL6A3    | 2q37.3          | 0.62  | 5.44x10 <sup>-5</sup>  | 0.0103                |
| DUBR      | 3q13.12         | 0.619 | 5.65x10 <sup>-5</sup>  | 0.0105                |
| LINC01559 | 12p13.1         | 0.619 | 5.77x10 <sup>-5</sup>  | 0.0105                |

|           |                     |       |                       |        |
|-----------|---------------------|-------|-----------------------|--------|
| MYOF      | 10q23.33            | 0.619 | 5.80x10 <sup>-5</sup> | 0.0105 |
| FKBP14    | 7p14.3              | 0.618 | 5.91x10 <sup>-5</sup> | 0.0105 |
| TCP11L2   | 12q23.3             | 0.615 | 6.59x10 <sup>-5</sup> | 0.0113 |
| VGLL3     | 3p12.1              | 0.614 | 6.77x10 <sup>-5</sup> | 0.0114 |
| CLIC4     | 1p36.11             | 0.614 | 6.83x10 <sup>-5</sup> | 0.0115 |
| SERPINE1  | 7q22.1              | 0.613 | 7.15x10 <sup>-5</sup> | 0.0117 |
| SULF2     | 20q13.12            | 0.612 | 7.28x10 <sup>-5</sup> | 0.0117 |
| MOSPD2    | Xp22.2              | 0.612 | 7.34x10 <sup>-5</sup> | 0.0117 |
| DLGAP4    | 20q11.23            | 0.612 | 7.41x10 <sup>-5</sup> | 0.0117 |
| PDGFRL    | 8p22                | 0.61  | 7.88x10 <sup>-5</sup> | 0.0124 |
| LINC00922 | 16q21               | 0.608 | 8.29x10 <sup>-5</sup> | 0.0126 |
| SOBP      | 6q21                | 0.608 | 8.31x10 <sup>-5</sup> | 0.0126 |
| PLEC      | 8q24.3              | 0.608 | 8.46x10 <sup>-5</sup> | 0.0126 |
| SLC9A6    | Xq26.3              | 0.607 | 8.61x10 <sup>-5</sup> | 0.0126 |
| GALNT17   | 7q11.22             | 0.607 | 8.76x10 <sup>-5</sup> | 0.0126 |
| SORT1     | 1p13.3 1p21.3-p13.1 | 0.607 | 8.76x10 <sup>-5</sup> | 0.0126 |
| MIR99AHG  | 21q21.1             | 0.607 | 8.76x10 <sup>-5</sup> | 0.0126 |
| UNC5C     | 4q22.3              | 0.606 | 8.84x10 <sup>-5</sup> | 0.0126 |
| DDR2      | 1q23.3              | 0.606 | 8.92x10 <sup>-5</sup> | 0.0126 |
| COL5A2    | 2q32.2              | 0.606 | 9.00x10 <sup>-5</sup> | 0.0126 |
| ADAM9     | 8p11.22             | 0.606 | 9.00x10 <sup>-5</sup> | 0.0126 |
| GPR176    | 15q14-q15.1         | 0.605 | 9.23x10 <sup>-5</sup> | 0.0128 |
| NFE2L3    | 7p15.2              | 0.604 | 9.48x10 <sup>-5</sup> | 0.0129 |
| PODNL1    | 19p13.12            | 0.604 | 9.65x10 <sup>-5</sup> | 0.0129 |
| PLAT      | 8p11.21             | 0.602 | 1.02x10 <sup>-4</sup> | 0.0134 |
| PXDN      | 2p25.3              | 0.602 | 1.04x10 <sup>-4</sup> | 0.0137 |
| RFLNA     | 12q24.31            | 0.601 | 1.08x10 <sup>-4</sup> | 0.0141 |
| LTBP2     | 14q24.3             | 0.6   | 1.09x10 <sup>-4</sup> | 0.0141 |
| CST6      | 11q13.1             | 0.6   | 1.11x10 <sup>-4</sup> | 0.0143 |
| FKBP7     | 2q31.2              | 0.599 | 1.12x10 <sup>-4</sup> | 0.0143 |
| PRKG1     | 10q11.23-q21.1      | 0.599 | 1.15x10 <sup>-4</sup> | 0.0145 |
| LOX       | 5q23.1              | 0.598 | 1.18x10 <sup>-4</sup> | 0.0146 |
| KLF7      | 2q33.3              | 0.597 | 1.20x10 <sup>-4</sup> | 0.0146 |
| TPRG1     | 3q28                | 0.597 | 1.21x10 <sup>-4</sup> | 0.0146 |
| ROR1      | 1p31.3              | 0.597 | 1.22x10 <sup>-4</sup> | 0.0146 |
| CCN4      | 8q24.22             | 0.596 | 1.25x10 <sup>-4</sup> | 0.0149 |
| MLXIP     | 12q24.31            | 0.595 | 1.30x10 <sup>-4</sup> | 0.0153 |
| SLIT2     | 4p15.31             | 0.595 | 1.31x10 <sup>-4</sup> | 0.0153 |
| TMCC2     | 1q32.1              | 0.595 | 1.31x10 <sup>-4</sup> | 0.0153 |
| ABHD5     | 3p21.33             | 0.594 | 1.34x10 <sup>-4</sup> | 0.0154 |
| FTSJ1     | Xp11.23             | 0.593 | 1.38x10 <sup>-4</sup> | 0.0155 |
| ADAM8     | 10q26.3             | 0.593 | 1.38x10 <sup>-4</sup> | 0.0155 |

|           |               |       |                       |        |
|-----------|---------------|-------|-----------------------|--------|
| MICAL2    | 11p15.3       | 0.593 | 1.39x10 <sup>-4</sup> | 0.0155 |
| PRSS22    | 16p13.3       | 0.593 | 1.40x10 <sup>-4</sup> | 0.0155 |
| KDM5B     | 1q32.1        | 0.593 | 1.40x10 <sup>-4</sup> | 0.0155 |
| LINC00643 | 14q23.2       | 0.592 | 1.41x10 <sup>-4</sup> | 0.0155 |
| COMP      | 19p13.11      | 0.592 | 1.42x10 <sup>-4</sup> | 0.0155 |
| DRAXIN    | 1p36.22       | 0.591 | 1.45x10 <sup>-4</sup> | 0.0156 |
| PPT1      | 1p34.2        | 0.591 | 1.46x10 <sup>-4</sup> | 0.0156 |
| RASA1     | 5q14.3        | 0.591 | 1.46x10 <sup>-4</sup> | 0.0156 |
| VCAM1     | 1p21.2        | 0.591 | 1.48x10 <sup>-4</sup> | 0.0156 |
| ITPRIPL2  | 16p12.3       | 0.591 | 1.49x10 <sup>-4</sup> | 0.0156 |
| VCL       | 10q22.2       | 0.591 | 1.49x10 <sup>-4</sup> | 0.0156 |
| PMP22     | 17p12         | 0.591 | 1.49x10 <sup>-4</sup> | 0.0156 |
| ZSWIM6    | 5q12.1        | 0.59  | 1.50x10 <sup>-4</sup> | 0.0156 |
| CERCAM    | 9q34.11       | 0.59  | 1.51x10 <sup>-4</sup> | 0.0157 |
| TM6SF1    | 15q25.2       | 0.59  | 1.54x10 <sup>-4</sup> | 0.0158 |
| TNFRSF11B | 8q24.12       | 0.589 | 1.58x10 <sup>-4</sup> | 0.0161 |
| MARCH1    | 4q32.2-q32.3  | 0.588 | 1.62x10 <sup>-4</sup> | 0.0163 |
| GEM       | 8q22.1        | 0.588 | 1.64x10 <sup>-4</sup> | 0.0163 |
| PDGFRB    | 5q32          | 0.588 | 1.64x10 <sup>-4</sup> | 0.0163 |
| FHL3      | 1p34.3        | 0.587 | 1.66x10 <sup>-4</sup> | 0.0163 |
| CCDC184   | 12q13.11      | 0.587 | 1.67x10 <sup>-4</sup> | 0.0163 |
| ANKRD50   | 4q28.1        | 0.587 | 1.69x10 <sup>-4</sup> | 0.0164 |
| TMPRSS11E | 4q13.2        | 0.587 | 1.70x10 <sup>-4</sup> | 0.0164 |
| RTL8B     | Xq26.3        | 0.586 | 1.71x10 <sup>-4</sup> | 0.0165 |
| SERTAD2   | 2p14          | 0.586 | 1.73x10 <sup>-4</sup> | 0.0165 |
| MMGT1     | Xq26.3        | 0.586 | 1.73x10 <sup>-4</sup> | 0.0165 |
| HOPX      | 4q12          | 0.586 | 1.76x10 <sup>-4</sup> | 0.0166 |
| C10ORF82  | 10q25.3       | 0.584 | 1.82x10 <sup>-4</sup> | 0.0169 |
| KIAA1217  | 10p12.2-p12.1 | 0.584 | 1.83x10 <sup>-4</sup> | 0.0169 |
| FOXF2     | 6p25.3        | 0.584 | 1.84x10 <sup>-4</sup> | 0.0169 |
| AKAP12    | 6q25.1        | 0.584 | 1.84x10 <sup>-4</sup> | 0.0169 |
| AEBP1     | 7p13          | 0.584 | 1.84x10 <sup>-4</sup> | 0.0169 |
| GXYLT2    | 3p13          | 0.583 | 1.91x10 <sup>-4</sup> | 0.0172 |
| HEPH      | Xq12          | 0.581 | 2.00x10 <sup>-4</sup> | 0.0177 |
| ELK3      | 12q23.1       | 0.581 | 2.00x10 <sup>-4</sup> | 0.0177 |
| LINC00882 | 3q13.12       | 0.58  | 2.06x10 <sup>-4</sup> | 0.0181 |
| DNAH11    | 7p15.3        | 0.58  | 2.07x10 <sup>-4</sup> | 0.0181 |
| LTBP1     | 2p22.3        | 0.58  | 2.10x10 <sup>-4</sup> | 0.0182 |
| PYGO1     | 15q21.3       | 0.58  | 2.12x10 <sup>-4</sup> | 0.0182 |
| C9ORF50   | 9q34.11       | 0.58  | 2.12x10 <sup>-4</sup> | 0.0182 |
| ITGA3     | 17q21.33      | 0.579 | 2.13x10 <sup>-4</sup> | 0.0182 |
| FMO2      | 1q24.3        | 0.579 | 2.17x10 <sup>-4</sup> | 0.0183 |

|          |               |       |                       |        |
|----------|---------------|-------|-----------------------|--------|
| MXRA8    | 1p36.33       | 0.579 | 2.17x10 <sup>-4</sup> | 0.0183 |
| CDCP1    | 3p21.31       | 0.579 | 2.18x10 <sup>-4</sup> | 0.0184 |
| OSMR     | 5p13.1        | 0.577 | 2.27x10 <sup>-4</sup> | 0.019  |
| LNPBK    | 2q31.1        | 0.577 | 2.29x10 <sup>-4</sup> | 0.019  |
| IL17RA   | 22q11.1       | 0.577 | 2.31x10 <sup>-4</sup> | 0.019  |
| RANBP2   | 2q13          | 0.576 | 2.36x10 <sup>-4</sup> | 0.0192 |
| PCDH1    | 5q31.3        | 0.576 | 2.38x10 <sup>-4</sup> | 0.0192 |
| FZD6     | 8q22.3        | 0.576 | 2.38x10 <sup>-4</sup> | 0.0192 |
| PIGA     | Xp22.2        | 0.576 | 2.40x10 <sup>-4</sup> | 0.0192 |
| FIGN     | 2q24.3        | 0.575 | 2.42x10 <sup>-4</sup> | 0.0193 |
| LUM      | 12q21.33      | 0.573 | 2.56x10 <sup>-4</sup> | 0.0201 |
| KIF26B   | 1q44          | 0.573 | 2.56x10 <sup>-4</sup> | 0.0201 |
| ERC1     | 12p13.33      | 0.573 | 2.60x10 <sup>-4</sup> | 0.0203 |
| TCIM     | 8p11.21       | 0.572 | 2.68x10 <sup>-4</sup> | 0.0205 |
| SGCD     | 5q33.2-q33.3  | 0.572 | 2.68x10 <sup>-4</sup> | 0.0205 |
| ALG10    | 12p11.1       | 0.572 | 2.70x10 <sup>-4</sup> | 0.0205 |
| PLEK2    | 14q23.3-q24.1 | 0.571 | 2.72x10 <sup>-4</sup> | 0.0205 |
| FLNA     | Xq28          | 0.571 | 2.72x10 <sup>-4</sup> | 0.0205 |
| TMEM43   | 3p25.1        | 0.571 | 2.72x10 <sup>-4</sup> | 0.0205 |
| CAVIN4   | 9q31.1        | 0.571 | 2.75x10 <sup>-4</sup> | 0.0205 |
| DCHS2    | 4q31.3        | 0.571 | 2.75x10 <sup>-4</sup> | 0.0205 |
| RAI14    | 5p13.2        | 0.571 | 2.79x10 <sup>-4</sup> | 0.0207 |
| PJA1     | Xq13.1        | 0.571 | 2.79x10 <sup>-4</sup> | 0.0207 |
| CDON     | 11q24.2       | 0.57  | 2.88x10 <sup>-4</sup> | 0.0213 |
| P4HA3    | 11q13.4       | 0.569 | 2.90x10 <sup>-4</sup> | 0.0213 |
| APBB2    | 4p14-p13      | 0.569 | 2.90x10 <sup>-4</sup> | 0.0213 |
| MFHAS1   | 8p23.1        | 0.569 | 2.97x10 <sup>-4</sup> | 0.0216 |
| LMCD1    | 3p25.3        | 0.569 | 2.97x10 <sup>-4</sup> | 0.0216 |
| PDLIM3   | 4q35.1        | 0.568 | 2.99x10 <sup>-4</sup> | 0.0216 |
| RLF      | 1p34.2        | 0.568 | 2.99x10 <sup>-4</sup> | 0.0216 |
| MARVELD1 | 10q24.2       | 0.568 | 3.04x10 <sup>-4</sup> | 0.0219 |
| MET      | 7q31.2        | 0.568 | 3.06x10 <sup>-4</sup> | 0.0219 |
| CHST3    | 10q22.1       | 0.566 | 3.23x10 <sup>-4</sup> | 0.0228 |
| ITGB1    | 10p11.22      | 0.566 | 3.23x10 <sup>-4</sup> | 0.0228 |

---

Table SII. Top 200 genes negatively correlated with LAMC2.

| Gene     | Cytoband | Spearman's correlation | P-value               | q-value               |
|----------|----------|------------------------|-----------------------|-----------------------|
| FMC1     | 7q34     | -0.706                 | 1.50x10 <sup>-6</sup> | 1.72x10 <sup>-3</sup> |
| MRPS11   | 15q25.3  | -0.698                 | 2.19x10 <sup>-6</sup> | 2.05x10 <sup>-3</sup> |
| RCC1L    | 7q11.23  | -0.698                 | 2.21x10 <sup>-6</sup> | 2.05x10 <sup>-3</sup> |
| SDHAP3   | 5p15.33  | -0.688                 | 3.62x10 <sup>-6</sup> | 2.51x10 <sup>-3</sup> |
| PCYT2    | 17q25.3  | -0.667                 | 8.93x10 <sup>-6</sup> | 4.57x10 <sup>-3</sup> |
| ATP5MC1  | 17q21.32 | -0.664                 | 1.02x10 <sup>-5</sup> | 4.96x10 <sup>-3</sup> |
| C6ORF136 | 6p21.33  | -0.651                 | 1.73x10 <sup>-5</sup> | 6.44x10 <sup>-3</sup> |
| ULK3     | 15q24.1  | -0.649                 | 1.84x10 <sup>-5</sup> | 6.46x10 <sup>-3</sup> |
| SLC25A11 | 17p13.2  | -0.649                 | 1.88x10 <sup>-5</sup> | 6.46x10 <sup>-3</sup> |
| NFS1     | 20q11.22 | -0.648                 | 1.96x10 <sup>-5</sup> | 6.46x10 <sup>-3</sup> |
| GSTK1    | 7q34     | -0.647                 | 2.00x10 <sup>-5</sup> | 6.46x10 <sup>-3</sup> |
| ATP5F1D  | 19p13.3  | -0.646                 | 2.06x10 <sup>-5</sup> | 6.46x10 <sup>-3</sup> |
| CLN6     | 15q23    | -0.644                 | 2.23x10 <sup>-5</sup> | 6.78x10 <sup>-3</sup> |
| ATP5PO   | 21q22.11 | -0.643                 | 2.35x10 <sup>-5</sup> | 6.92x10 <sup>-3</sup> |
| MRPS25   | 3p25.1   | -0.639                 | 2.70x10 <sup>-5</sup> | 7.60x10 <sup>-3</sup> |
| COX4I1   | 16q24.1  | -0.638                 | 2.80x10 <sup>-5</sup> | 7.79x10 <sup>-3</sup> |
| TMEM86B  | 19q13.42 | -0.634                 | 3.34x10 <sup>-5</sup> | 9.02x10 <sup>-3</sup> |
| AARS2    | 6p21.1   | -0.63                  | 3.78x10 <sup>-5</sup> | 9.14x10 <sup>-3</sup> |
| COQ9     | 16q21    | -0.628                 | 4.08x10 <sup>-5</sup> | 9.14x10 <sup>-3</sup> |
| COX5A    | 15q24.2  | -0.627                 | 4.3x10 <sup>-5</sup>  | 9.14x10 <sup>-3</sup> |
| PDZD9    | 16p12.2  | -0.626                 | 4.41x10 <sup>-5</sup> | 9.14x10 <sup>-3</sup> |
| ACAD10   | 12q24.12 | -0.626                 | 4.44x10 <sup>-5</sup> | 9.14x10 <sup>-3</sup> |
| COX6B1   | 19q13.12 | -0.624                 | 4.74x10 <sup>-5</sup> | 9.31x10 <sup>-3</sup> |
| DHRS11   | 17q12    | -0.619                 | 5.80x10 <sup>-5</sup> | 0.0105                |
| UQCR10   | 22q12.2  | -0.618                 | 5.86x10 <sup>-5</sup> | 0.0105                |
| MED9     | 17p11.2  | -0.617                 | 6.19x10 <sup>-5</sup> | 0.0109                |
| DGCR5    | 22q11.21 | -0.616                 | 6.41x10 <sup>-5</sup> | 0.0112                |
| ATP5PF   | 21q21.3  | -0.615                 | 6.59x10 <sup>-5</sup> | 0.0113                |
| SH2B1    | 16p11.2  | -0.614                 | 6.71x10 <sup>-5</sup> | 0.0114                |
| CLUH     | 17p13.3  | -0.613                 | 7.15x10 <sup>-5</sup> | 0.0117                |
| GATD3A   | 21q22.3  | -0.612                 | 7.34x10 <sup>-5</sup> | 0.0117                |
| MRPL46   | 15q25.3  | -0.612                 | 7.34x10 <sup>-5</sup> | 0.0117                |
| NDUFS7   | 19p13.3  | -0.609                 | 8.02x10 <sup>-5</sup> | 0.0125                |
| SERF2    | 15q15.3  | -0.608                 | 8.24x10 <sup>-5</sup> | 0.0126                |
| COX7A2   | 6q14.1   | -0.608                 | 8.46x10 <sup>-5</sup> | 0.0126                |
| UQCR11   | 19p13.3  | -0.606                 | 8.84x10 <sup>-5</sup> | 0.0126                |
| ABHD14B  | 3p21.2   | -0.605                 | 9.31x10 <sup>-5</sup> | 0.0128                |
| PMPCB    | 7q22.1   | -0.604                 | 9.48x10 <sup>-5</sup> | 0.0129                |
| ACO2     | 22q13.2  | -0.604                 | 9.65x10 <sup>-5</sup> | 0.0129                |
| DDTL     | 22q11.23 | -0.604                 | 9.73x10 <sup>-5</sup> | 0.013                 |

|           |              |        |                       |        |
|-----------|--------------|--------|-----------------------|--------|
| PCCB      | 3q22.3       | -0.599 | 1.14x10 <sup>-4</sup> | 0.0144 |
| TBRG4     | 7p13         | -0.598 | 1.18x10 <sup>-4</sup> | 0.0146 |
| ELAC2     | 17p12        | -0.598 | 1.18x10 <sup>-4</sup> | 0.0146 |
| IZUMO4    | 19p13.3      | -0.597 | 1.22x10 <sup>-4</sup> | 0.0146 |
| MAP3K11   | 11q13.1      | -0.597 | 1.22x10 <sup>-4</sup> | 0.0146 |
| EPN1      | 19q13.42     | -0.596 | 1.27x10 <sup>-4</sup> | 0.015  |
| OARD1     | 6p21.1       | -0.594 | 1.32x10 <sup>-4</sup> | 0.0153 |
| SNRNP25   | 16p13.3      | -0.594 | 1.35x10 <sup>-4</sup> | 0.0154 |
| CLYBL     | 13q32.3      | -0.594 | 1.36x10 <sup>-4</sup> | 0.0154 |
| TACO1     | 17q23.3      | -0.591 | 1.48x10 <sup>-4</sup> | 0.0156 |
| COMMD4    | 15q24.2      | -0.589 | 1.56x10 <sup>-4</sup> | 0.016  |
| EPHX2     | 8p21.2-p21.1 | -0.588 | 1.60x10 <sup>-4</sup> | 0.0162 |
| DDT       | 22q11.23     | -0.588 | 1.63x10 <sup>-4</sup> | 0.0163 |
| RNF5P1    | 8p11.22      | -0.587 | 1.67x10 <sup>-4</sup> | 0.0163 |
| SDHA      | 5p15.33      | -0.585 | 1.81x10 <sup>-4</sup> | 0.0169 |
| RNF167    | 17p13.2      | -0.584 | 1.86x10 <sup>-4</sup> | 0.0169 |
| NDUFA1    | Xq24         | -0.584 | 1.87x10 <sup>-4</sup> | 0.0169 |
| UQCRC1    | 3p21.31      | -0.584 | 1.87x10 <sup>-4</sup> | 0.0169 |
| MED11     | 17p13.2      | -0.584 | 1.87x10 <sup>-4</sup> | 0.0169 |
| UBB       | 17p11.2      | -0.582 | 1.95x10 <sup>-4</sup> | 0.0175 |
| GLYCTK    | 3p21.2       | -0.581 | 2.02x10 <sup>-4</sup> | 0.0178 |
| NDUFV1    | 11q13.2      | -0.581 | 2.03x10 <sup>-4</sup> | 0.0179 |
| CIAO2A    | 15q22.31     | -0.58  | 2.12x10 <sup>-4</sup> | 0.0182 |
| MRPL39    | 21q21.3      | -0.578 | 2.24x10 <sup>-4</sup> | 0.0187 |
| MRPL38    | 17q25.1      | -0.577 | 2.31x10 <sup>-4</sup> | 0.019  |
| PDZK1     | 1q21.1       | -0.577 | 2.33x10 <sup>-4</sup> | 0.0191 |
| PDHA1     | Xp22.12      | -0.576 | 2.36x10 <sup>-4</sup> | 0.0192 |
| NDUFB2    | 7q34         | -0.576 | 2.38x10 <sup>-4</sup> | 0.0192 |
| GAK       | 4p16.3       | -0.574 | 2.54x10 <sup>-4</sup> | 0.0201 |
| FAM223B   | Xq28         | -0.573 | 2.56x10 <sup>-4</sup> | 0.0201 |
| NDUFA10   | 2q37.3       | -0.573 | 2.62x10 <sup>-4</sup> | 0.0204 |
| NDUFS6    | 5p15.33      | -0.572 | 2.64x10 <sup>-4</sup> | 0.0205 |
| SCRN2     | 17q21.32     | -0.571 | 2.75x10 <sup>-4</sup> | 0.0205 |
| ATG4D     | 19p13.2      | -0.568 | 3.06x10 <sup>-4</sup> | 0.0219 |
| COX5B     | 2q11.2       | -0.567 | 3.09x10 <sup>-4</sup> | 0.022  |
| ELL3      | 15q15.3      | -0.567 | 3.11x10 <sup>-4</sup> | 0.0221 |
| C15ORF40  | 15q25.2      | -0.565 | 3.33x10 <sup>-4</sup> | 0.0233 |
| ECSIT     | 19p13.2      | -0.563 | 3.49x10 <sup>-4</sup> | 0.024  |
| ATP5MPL   | 14q32.33     | -0.563 | 3.51x10 <sup>-4</sup> | 0.024  |
| LOC728613 | 5p15.33      | -0.562 | 3.60x10 <sup>-4</sup> | 0.0244 |
| CDAN1     | 15q15.2      | -0.561 | 3.68x10 <sup>-4</sup> | 0.0245 |
| FAM192A   | 16q13        | -0.561 | 3.71x10 <sup>-4</sup> | 0.0246 |
| GLI4      | 8q24.3       | -0.561 | 3.76x10 <sup>-4</sup> | 0.0249 |

|           |                 |        |                       |        |
|-----------|-----------------|--------|-----------------------|--------|
| HADHA     | 2p23.3          | -0.56  | 3.85x10 <sup>-4</sup> | 0.0251 |
| COX7B     | Xq21.1          | -0.56  | 3.88x10 <sup>-4</sup> | 0.0251 |
| HINT2     | 9p13.3          | -0.56  | 3.88x10 <sup>-4</sup> | 0.0251 |
| VRK3      | 19q13.33        | -0.559 | 3.91x10 <sup>-4</sup> | 0.0252 |
| NDUFB5    | 3q26.33         | -0.559 | 3.97x10 <sup>-4</sup> | 0.0254 |
| ZFPM1     | 16q24.2         | -0.558 | 4.09x10 <sup>-4</sup> | 0.0255 |
| SARS2     | 19q13.2         | -0.558 | 4.09x10 <sup>-4</sup> | 0.0255 |
| MCRIP2    | 16p13.3         | -0.558 | 4.12x10 <sup>-4</sup> | 0.0255 |
| NDUFB1    | 14q32.12        | -0.556 | 4.27x10 <sup>-4</sup> | 0.0256 |
| MLYCD     | 16q23.3         | -0.556 | 4.27x10 <sup>-4</sup> | 0.0256 |
| HGD       | 3q13.33         | -0.556 | 4.27x10 <sup>-4</sup> | 0.0256 |
| TCTA      | 3p21.31         | -0.555 | 4.37x10 <sup>-4</sup> | 0.0259 |
| PLGRKT    | 9p24.1          | -0.553 | 4.64x10 <sup>-4</sup> | 0.0268 |
| ECH1      | 19q13.2         | -0.549 | 5.33x10 <sup>-4</sup> | 0.0289 |
| FASTK     | 7q36.1          | -0.549 | 5.33x10 <sup>-4</sup> | 0.0289 |
| CYC1      | 8q24.3          | -0.547 | 5.61x10 <sup>-4</sup> | 0.029  |
| TIMM44    | 19p13.2         | -0.546 | 5.65x10 <sup>-4</sup> | 0.029  |
| NDUFA4    | 7p21.3          | -0.546 | 5.69x10 <sup>-4</sup> | 0.029  |
| VPS9D1    | 16q24.3         | -0.546 | 5.69x10 <sup>-4</sup> | 0.029  |
| SFXN4     | 10q26.11        | -0.545 | 5.81x10 <sup>-4</sup> | 0.0293 |
| GINS3     | 16q21           | -0.545 | 5.85x10 <sup>-4</sup> | 0.0293 |
| ATP5IF1   | 1p35.3          | -0.544 | 5.98x10 <sup>-4</sup> | 0.0297 |
| MPDU1     | 17p13.1         | -0.543 | 6.16x10 <sup>-4</sup> | 0.0302 |
| PMS2P5    | 7q11.23         | -0.543 | 6.16x10 <sup>-4</sup> | 0.0302 |
| TUFM      | 16p11.2         | -0.543 | 6.20x10 <sup>-4</sup> | 0.0303 |
| NDUFS3    | 11p11.2         | -0.543 | 6.24x10 <sup>-4</sup> | 0.0304 |
| CALM3     | 19q13.32        | -0.542 | 6.47x10 <sup>-4</sup> | 0.0313 |
| PTRHD1    | 2p23.3          | -0.541 | 6.52x10 <sup>-4</sup> | 0.0313 |
| BLOC1S1   | 12q13.2         | -0.541 | 6.61x10 <sup>-4</sup> | 0.0315 |
| TXN2      | 22q12.3         | -0.54  | 6.85x10 <sup>-4</sup> | 0.0321 |
| TMED6     | 16q22.1         | -0.538 | 7.09x10 <sup>-4</sup> | 0.0328 |
| MRM1      | 17q12           | -0.538 | 7.19x10 <sup>-4</sup> | 0.0331 |
| CHCHD10   | 22q11.23        | -0.537 | 7.24x10 <sup>-4</sup> | 0.0331 |
| MRPL35    | 2p11.2          | -0.536 | 7.45x10 <sup>-4</sup> | 0.0336 |
| NAPA      | 19q13.32-q13.33 | -0.536 | 7.45x10 <sup>-4</sup> | 0.0336 |
| HNF1A     | 12q24.31        | -0.536 | 7.61x10 <sup>-4</sup> | 0.0338 |
| C7ORF50   | 7p22.3          | -0.536 | 7.61x10 <sup>-4</sup> | 0.0338 |
| SRRM2-AS1 | 16p13.3         | -0.534 | 7.88x10 <sup>-4</sup> | 0.0345 |
| MRPS22    | 3q23            | -0.534 | 7.88x10 <sup>-4</sup> | 0.0345 |
| COX8A     | 11q13.1         | -0.533 | 8.10x10 <sup>-4</sup> | 0.0348 |
| MRPS24    | 7p13            | -0.533 | 8.27x10 <sup>-4</sup> | 0.035  |
| ST20      | 15q25.1         | -0.532 | 8.33x10 <sup>-4</sup> | 0.035  |

|          |          |        |                       |        |
|----------|----------|--------|-----------------------|--------|
| TOMM6    | 6p21.1   | -0.532 | 8.33x10 <sup>-4</sup> | 0.035  |
| ZFAND6   | 15q25.1  | -0.532 | 8.50x10 <sup>-4</sup> | 0.0354 |
| TMEM143  | 19q13.33 | -0.531 | 8.68x10 <sup>-4</sup> | 0.0358 |
| SRP14    | 15q15.1  | -0.531 | 8.68x10 <sup>-4</sup> | 0.0358 |
| NAA60    | 16p13.3  | -0.531 | 8.74x10 <sup>-4</sup> | 0.036  |
| AKR7A2   | 1p36.13  | -0.53  | 8.80x10 <sup>-4</sup> | 0.036  |
| SPG7     | 16q24.3  | -0.529 | 8.98x10 <sup>-4</sup> | 0.0366 |
| INCA1    | 17p13.2  | -0.528 | 9.29x10 <sup>-4</sup> | 0.0377 |
| REPIN1   | 7q36.1   | -0.528 | 9.36x10 <sup>-4</sup> | 0.0378 |
| IDNK     | 9q21.32  | -0.523 | 1.08x10 <sup>-3</sup> | 0.0408 |
| ZC3HC1   | 7q32.2   | -0.521 | 1.11x10 <sup>-3</sup> | 0.0415 |
| ATP5MG   | 11q23.3  | -0.521 | 1.12x10 <sup>-3</sup> | 0.042  |
| ATP5MC3  | 2q31.1   | -0.52  | 1.14x10 <sup>-3</sup> | 0.0422 |
| FAHD2A   | 2q11.1   | -0.519 | 1.18x10 <sup>-3</sup> | 0.043  |
| SAFB2    | 19p13.3  | -0.519 | 1.18x10 <sup>-3</sup> | 0.0431 |
| MRPL2    | 6p21.1   | -0.518 | 1.21x10 <sup>-3</sup> | 0.0437 |
| COG4     | 16q22.1  | -0.518 | 1.22x10 <sup>-3</sup> | 0.044  |
| PLEKHJ1  | 19p13.3  | -0.517 | 1.23x10 <sup>-3</sup> | 0.044  |
| ATP5PD   | 17q25.1  | -0.517 | 1.24x10 <sup>-3</sup> | 0.0441 |
| SCN4A    | 17q23.3  | -0.516 | 1.28x10 <sup>-3</sup> | 0.0447 |
| MRPS12   | 19q13.2  | -0.514 | 1.35x10 <sup>-3</sup> | 0.0462 |
| NDUFA13  | 19p13.11 | -0.512 | 1.40x10 <sup>-3</sup> | 0.0469 |
| TRAPPC1  | 17p13.1  | -0.512 | 1.41x10 <sup>-3</sup> | 0.0469 |
| MTHFSD   | 16q24.1  | -0.512 | 1.41x10 <sup>-3</sup> | 0.0469 |
| UCN      | 2p23.3   | -0.512 | 1.41x10 <sup>-3</sup> | 0.0469 |
| PARP16   | 15q22.31 | -0.511 | 1.45x10 <sup>-3</sup> | 0.0481 |
| COX6C    | 8q22.2   | -0.51  | 1.47x10 <sup>-3</sup> | 0.0485 |
| LAMTOR1  | 11q13.4  | -0.51  | 1.50x10 <sup>-3</sup> | 0.0491 |
| MRPS18A  | 6p21.1   | -0.509 | 1.54x10 <sup>-3</sup> | 0.0498 |
| PPCDC    | 15q24.2  | -0.509 | 1.54x10 <sup>-3</sup> | 0.0498 |
| FCSK     | 16q22.1  | -0.508 | 1.55x10 <sup>-3</sup> | 0.0498 |
| TMEM191A | 22q11.21 | -0.507 | 1.59x10 <sup>-3</sup> | 0.0508 |
| ATP13A1  | 19p13.11 | -0.506 | 1.64x10 <sup>-3</sup> | 0.0518 |
| ACBD4    | 17q21.31 | -0.505 | 1.69x10 <sup>-3</sup> | 0.0527 |
| PRADC1   | 2p13.2   | -0.505 | 1.70x10 <sup>-3</sup> | 0.0528 |
| IVD      | 15q15.1  | -0.504 | 1.73x10 <sup>-3</sup> | 0.0531 |
| CRIP3    | 6p21.1   | -0.504 | 1.73x10 <sup>-3</sup> | 0.0532 |
| SLC37A4  | 11q23.3  | -0.503 | 1.75x10 <sup>-3</sup> | 0.0532 |
| NBR2     | 17q21.31 | -0.503 | 1.75x10 <sup>-3</sup> | 0.0532 |
| SPG21    | 15q22.31 | -0.503 | 1.76x10 <sup>-3</sup> | 0.0532 |
| HDDC3    | 15q26.1  | -0.503 | 1.76x10 <sup>-3</sup> | 0.0532 |
| ABHD10   | 3q13.2   | -0.501 | 1.85x10 <sup>-3</sup> | 0.0547 |
| MAD2L1BP | 6p21.1   | -0.501 | 1.86x10 <sup>-3</sup> | 0.055  |

|           |                        |        |                       |        |
|-----------|------------------------|--------|-----------------------|--------|
| C12ORF65  | 12q24.31               | -0.501 | 1.87x10 <sup>-3</sup> | 0.055  |
| MRPS5     | 2q11.1                 | -0.5   | 1.90x10 <sup>-3</sup> | 0.0555 |
| TSEN54    | 17q25.1                | -0.5   | 1.91x10 <sup>-3</sup> | 0.0555 |
| NDUFA8    | 9q33.2                 | -0.499 | 1.94x10 <sup>-3</sup> | 0.0563 |
| PXMP2     | 12q24.33               | -0.499 | 1.96x10 <sup>-3</sup> | 0.0565 |
| DDX28     | 16q22.1                | -0.499 | 1.97x10 <sup>-3</sup> | 0.0567 |
| TXNL4B    | 16q22.2                | -0.499 | 1.97x10 <sup>-3</sup> | 0.0567 |
| RPP25L    | 9p13.3                 | -0.498 | 1.98x10 <sup>-3</sup> | 0.0569 |
| MDH1      | 2p15                   | -0.497 | 2.03x10 <sup>-3</sup> | 0.0576 |
| UQCC1     | 20q11.22               | -0.497 | 2.03x10 <sup>-3</sup> | 0.0576 |
| MRPL58    | 17q25.1                | -0.497 | 2.04x10 <sup>-3</sup> | 0.0578 |
| DCAKD     | 17q21.31               | -0.497 | 2.06x10 <sup>-3</sup> | 0.0579 |
| OXER1     | 2p21                   | -0.497 | 2.07x10 <sup>-3</sup> | 0.058  |
| KATNAL2   | 18q21.1                | -0.495 | 2.12x10 <sup>-3</sup> | 0.0587 |
| HMG2      | 1p36.11                | -0.495 | 2.13x10 <sup>-3</sup> | 0.059  |
| VAC14     | 16q22.1-q22.2          | -0.495 | 2.16x10 <sup>-3</sup> | 0.0593 |
| GTPBP6    | Xp22.33 and<br>Yp11.31 | -0.494 | 2.19x10 <sup>-3</sup> | 0.0599 |
| TNMD      | Xq22.1                 | -0.494 | 2.20x10 <sup>-3</sup> | 0.0601 |
| NT5M      | 17p11.2                | -0.494 | 2.21x10 <sup>-3</sup> | 0.0601 |
| IDH3B     | 20p13                  | -0.494 | 2.21x10 <sup>-3</sup> | 0.0601 |
| SCAND2P   | 15q25.2                | -0.493 | 2.24x10 <sup>-3</sup> | 0.0603 |
| CIAPIN1   | 16q21                  | -0.493 | 2.26x10 <sup>-3</sup> | 0.0603 |
| EEF1AKMT1 | 13q12.11               | -0.493 | 2.27x10 <sup>-3</sup> | 0.0603 |
| CYCS      | 7p15.3                 | -0.492 | 2.30x10 <sup>-3</sup> | 0.0606 |
| NDUFB8    | 10q24.31               | -0.492 | 2.31x10 <sup>-3</sup> | 0.0606 |
| PPP1R10   | 6p21.33                | -0.492 | 2.31x10 <sup>-3</sup> | 0.0606 |
| HSPBP1    | 19q13.42               | -0.492 | 2.33x10 <sup>-3</sup> | 0.0606 |
| PSPH      | 7p11.2                 | -0.491 | 2.37x10 <sup>-3</sup> | 0.0612 |
| PDCD6     | 5p15.33                | -0.489 | 2.47x10 <sup>-3</sup> | 0.0632 |
| NDUFAF1   | 15q15.1                | -0.489 | 2.49x10 <sup>-3</sup> | 0.0634 |
| C6ORF203  | 6q21                   | -0.489 | 2.49x10 <sup>-3</sup> | 0.0634 |
| ELP3      | 8p21.1                 | -0.488 | 2.52x10 <sup>-3</sup> | 0.0636 |

---
